# Supplementary material for: Gold nanorods in an oil-base formulation for transdermal treatment of type 1 diabetes in mice
Source: Royal Society of Chemistry journal article supplement (doi:10.1039/c2nr30651d), 2012-01-01
Supplement: c2nr30651d.pdf [file c2nr30651d.pdf]

## Supporting Information

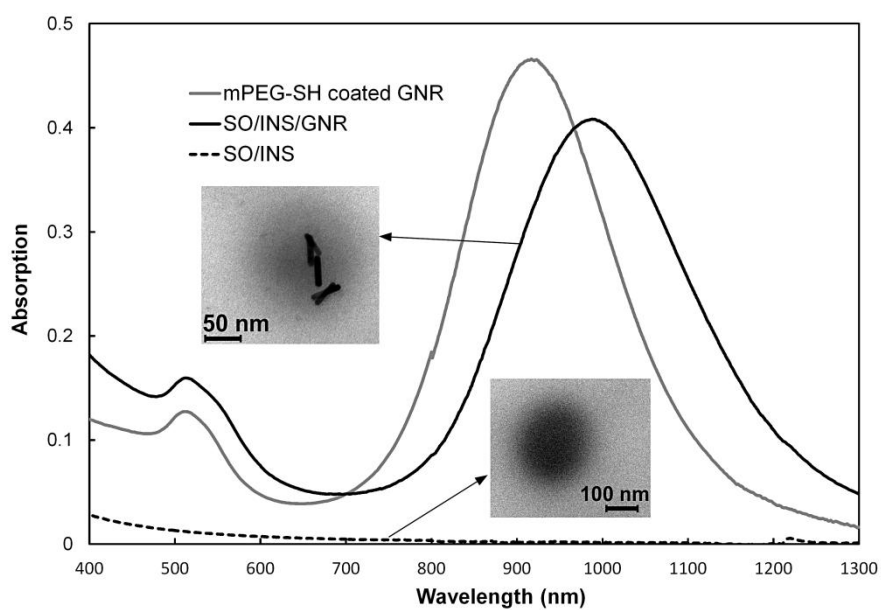

**Figure S1.** Absorption spectra and TEM images after application of the SO/INS and SO/INS/GNR formulations. The insulin concentration was increased to 3.7 mg/mL.
